# Supplementary material for: Steel Converter Slag as an Oxygen Carrier—Interaction with Sulfur Dioxide
Source: MDPI journal article supplement (doi:10.3390/en15165922), 2022-08-15
Supplement: s1 [file s1]

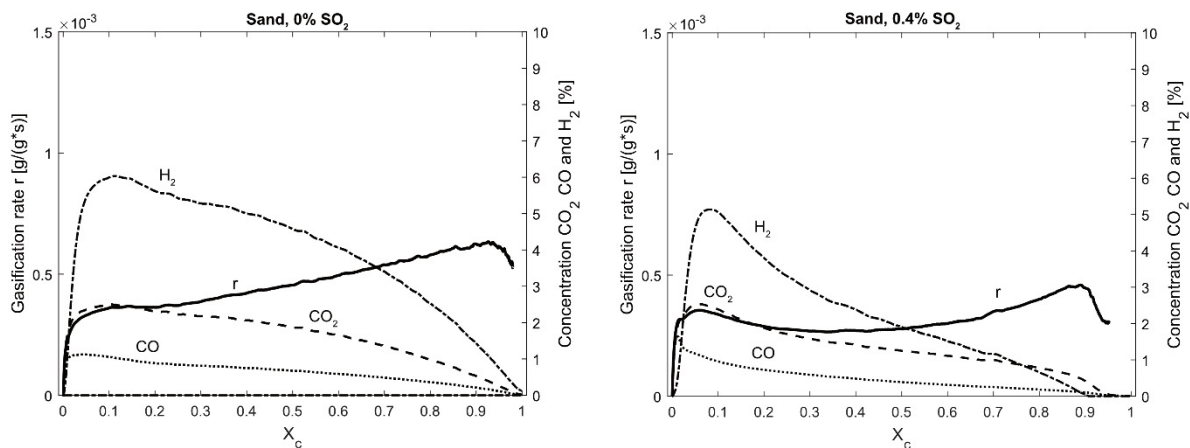

**Figure S1.** Gasification experiments with sand and devolatilized wood char at 870°C.

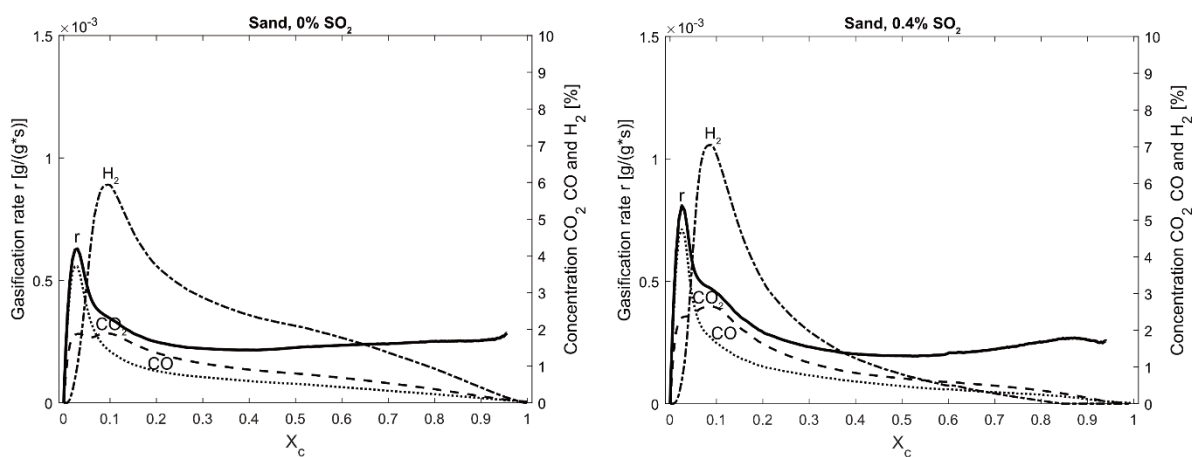

**Figure S2.** Gasification experiments with sand and german wood char at 870°C. Here a significant volatiles peak can be seen comparing Figure S1 and Figure S2 besides that the reactivity of the devolatilized wood char is slightly higher.

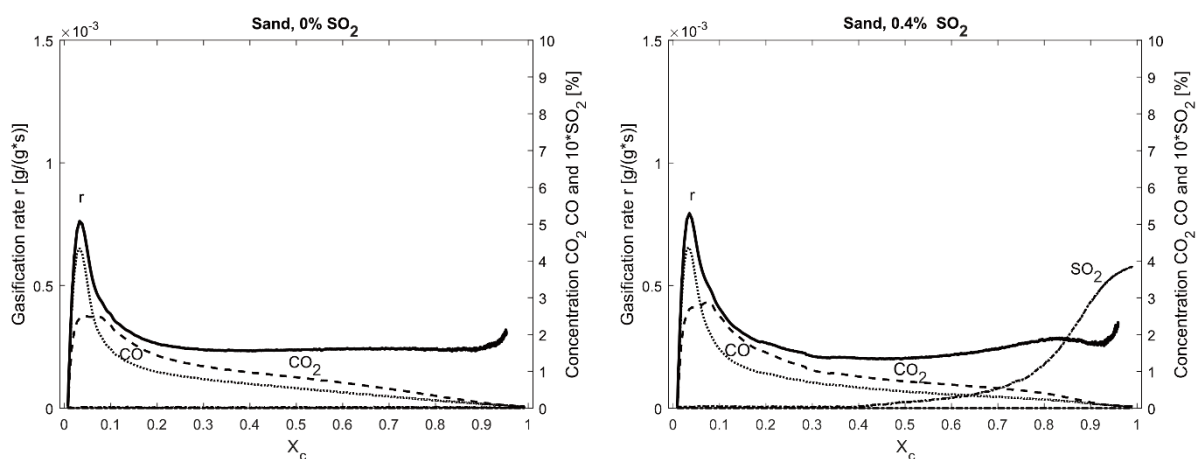

**Figure S3.** Gasification experiments with sand and german wood char at 870°C using the gas analyzer measuring SO<sub>2</sub> in the outgoing gases.

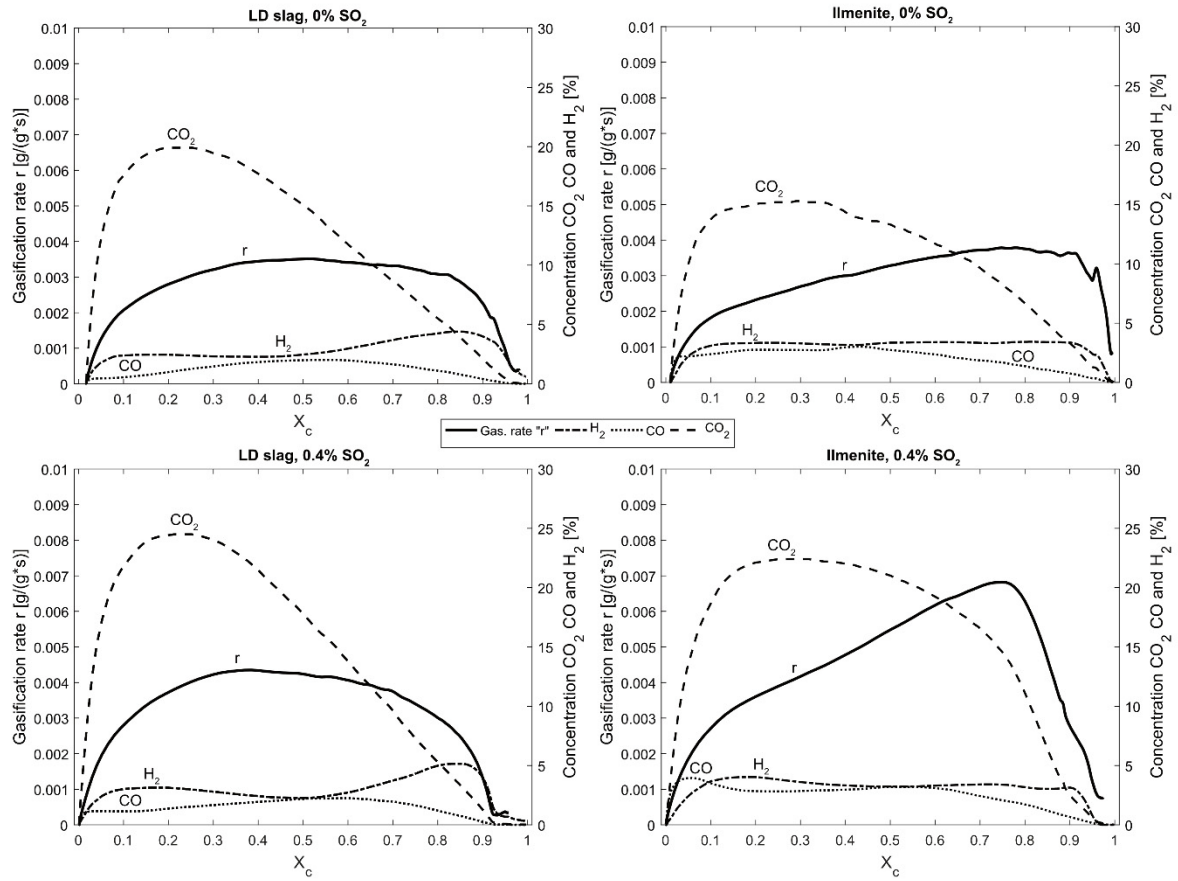

**Figure S4.** Gasification rate " $r$ " and concentration of outgoing gases as a function of  $X_c$  for LD slag and Ilmenite at 970°C. The two upper figures are without the presence of  $\text{SO}_2$  and the two lower figures are for experiments using 0.4%  $\text{SO}_2$ . Curves are selected as the middle curve within the max and minimum gasification rate " $r$ " displayed as gray areas in **Error! Reference source not found.**. Devolatilized wood pellets were used as fuel for these experiments.

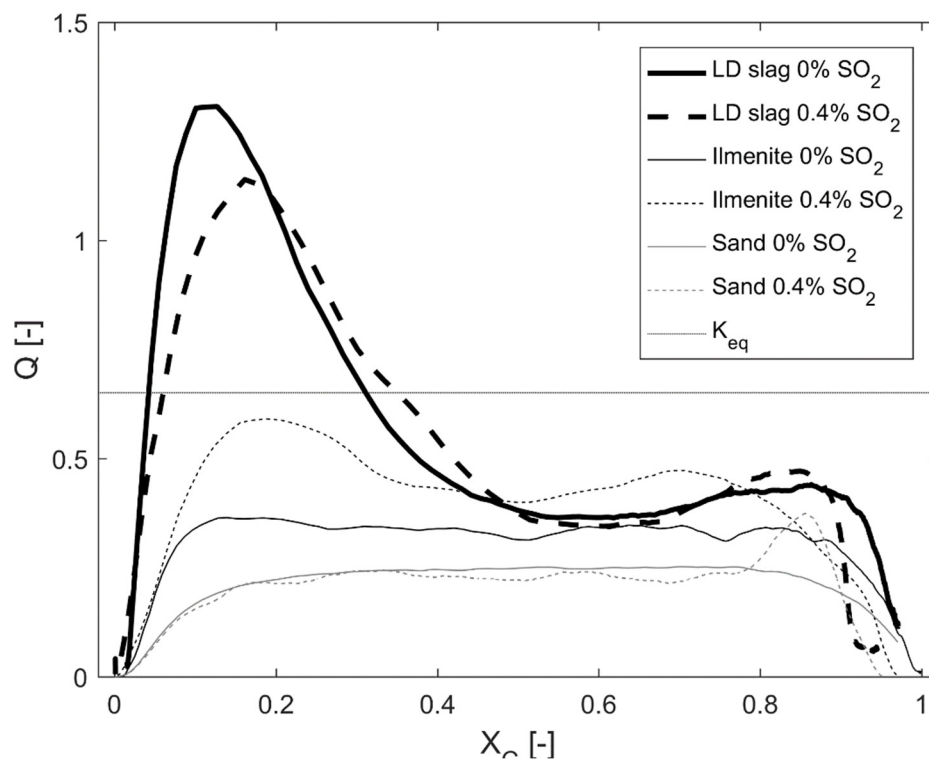

**Figure S5.** The reaction quotient  $Q$  for LD slag, ilmenite and sand with and without the presence of  $SO_2$  in the fluidization gas plotted against the conversion of the incoming carbon,  $X_c$ . Experiments were performed at 970°C using 0.2g fuel. The dotted horizontal line in the figure is the equilibrium constant  $K_{eq}$  for the WGS reaction at 970°C.

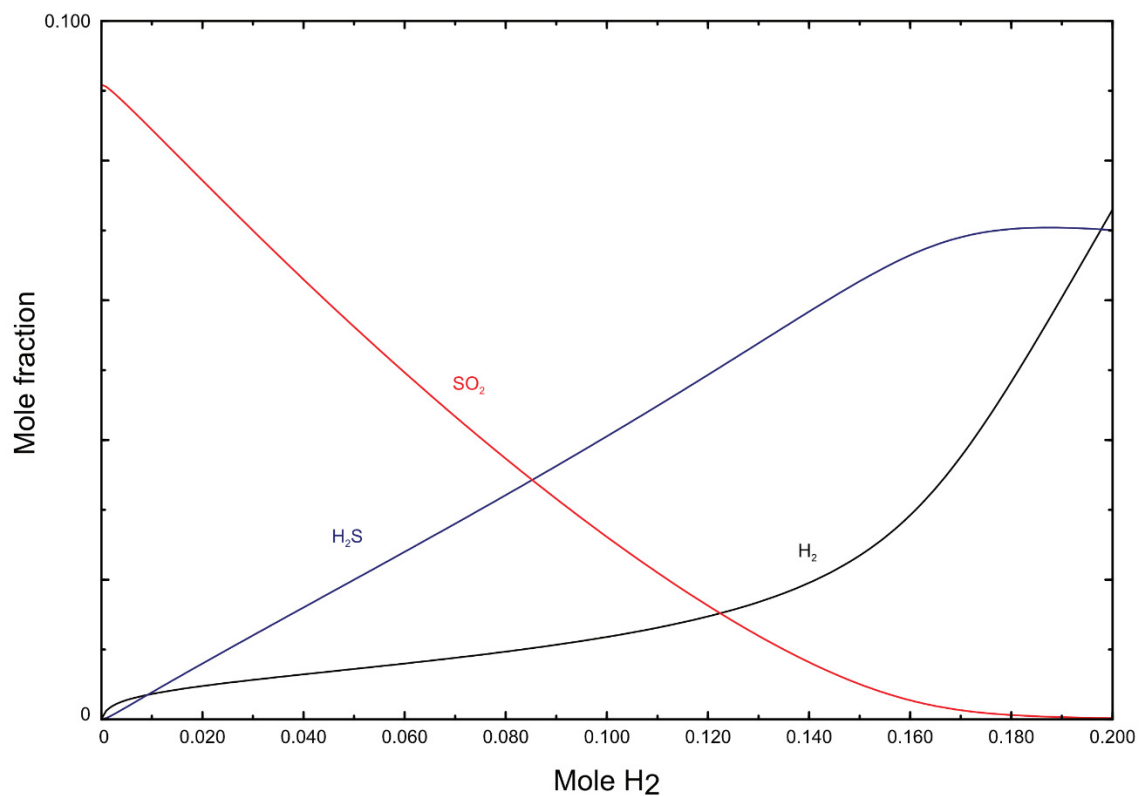

**Figure S6.** Equilibrium of sulphur species as a function of ingoing amount of  $H_2$ . Equilibrium is based on an 0.05 mole  $SO_2$  and 0.5 mole  $H_2O$ . It is very simplified to just show the effect of  $H_2$  on the conversion of  $SO_2$  to  $H_2S$  at 850°C. If including CO and  $CO_2$  WGS will generate  $H_2$  and this will form  $H_2S$  even with no ingoing  $H_2$ .

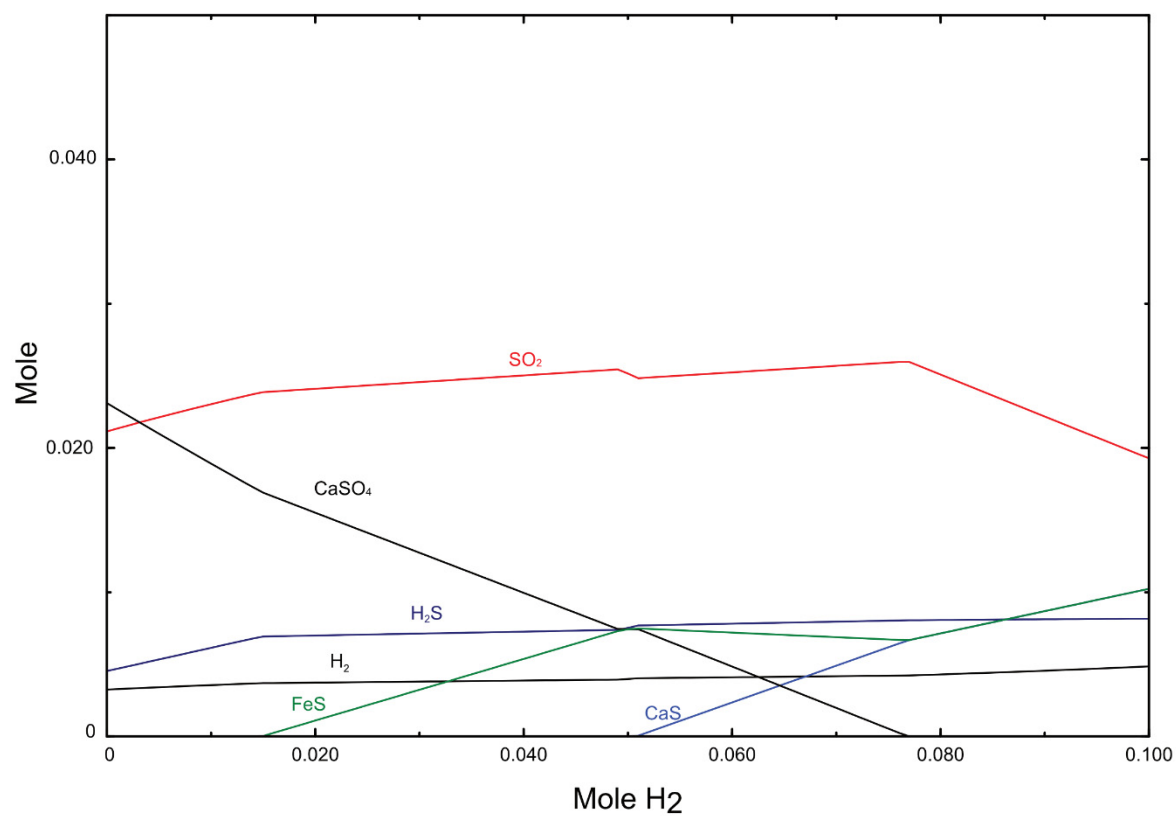

**Figure S7.** Equilibrium of 0.5 mole  $Ca_2Fe_2O_5$  with 0.05 mole  $SO_2$  + 0.5 mole  $H_2O$  as a function of mole  $H_2$  at 850°C. This indicates that  $CaSO_4$  and  $CaS$  can be formed to some extent from  $Ca_2Fe_2O_5$  in presence of sulphur.

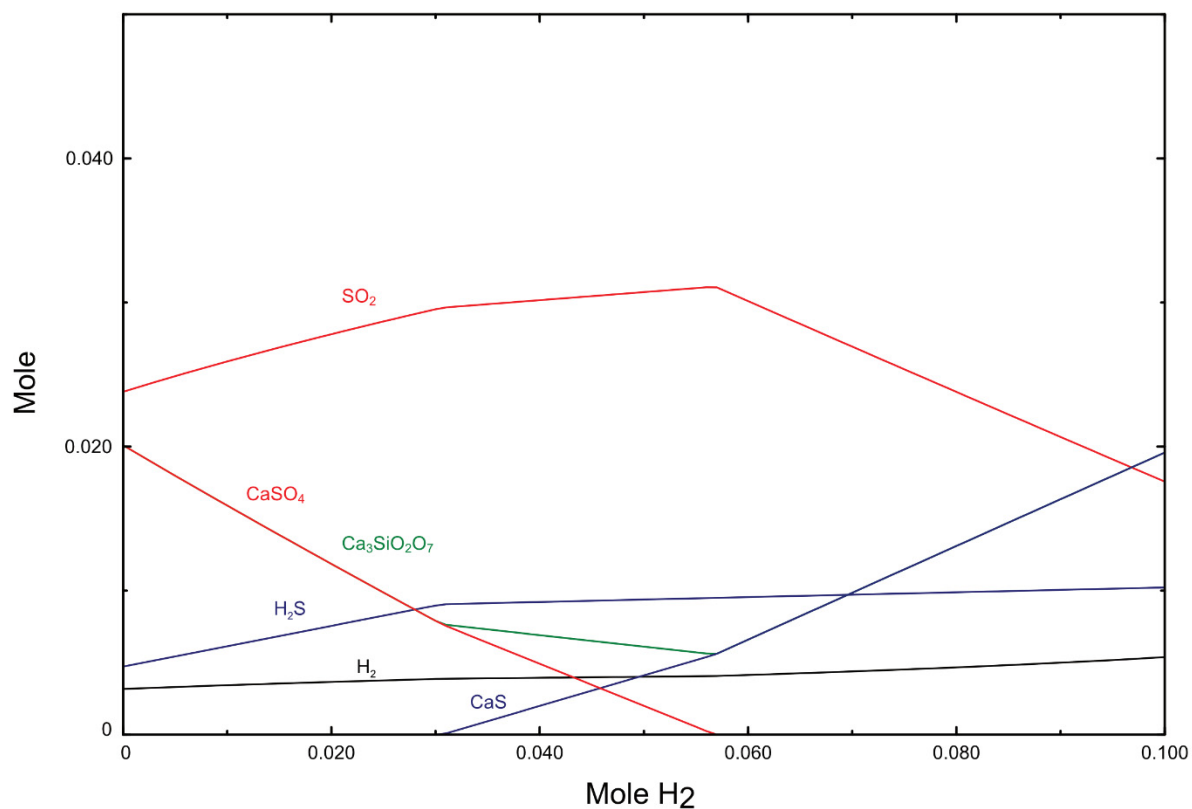

**Figure S8.** Equilibrium of 0.5 mole  $\text{Ca}_2\text{SiO}_4$  with 0.05 mole  $\text{SO}_2$  + 0.5 mole  $\text{H}_2\text{O}$  as a function of mole  $\text{H}_2$  at  $850^\circ\text{C}$ . This indicates that  $\text{CaSO}_4$  and  $\text{CaS}$  can be formed to some extent from calcium silicates in presence of sulphur.

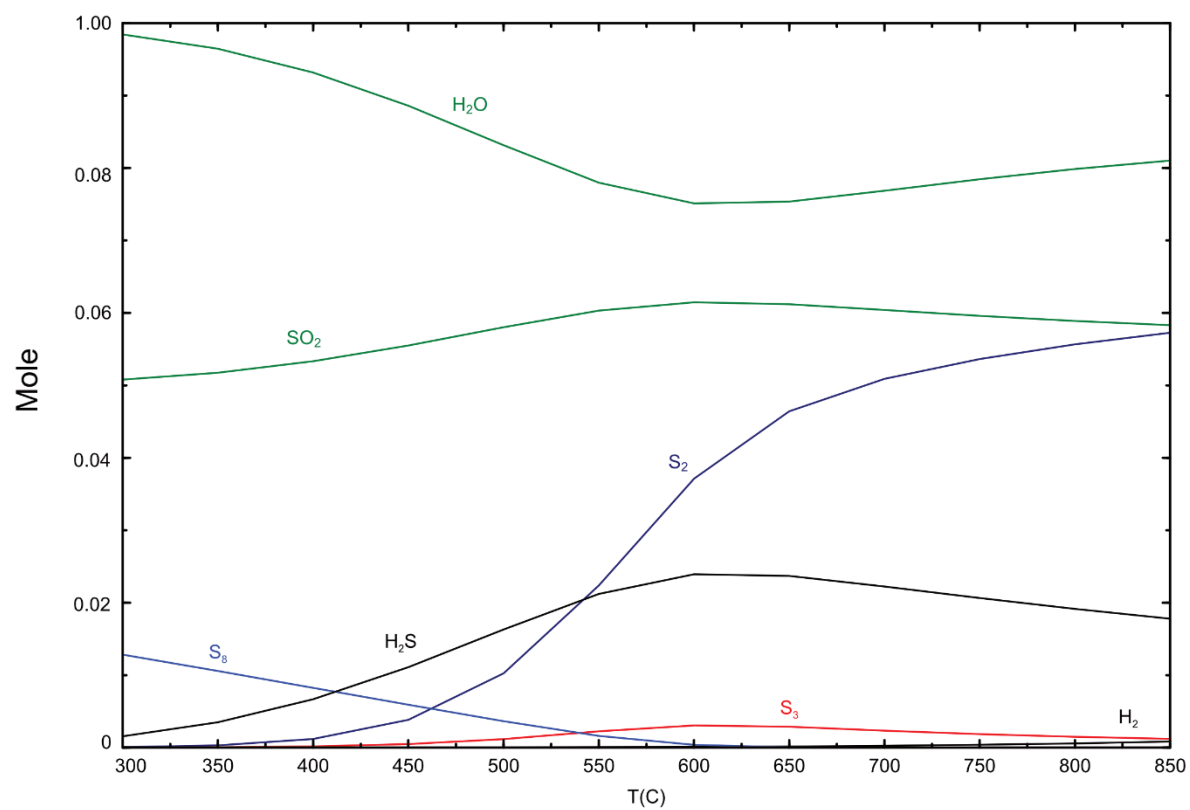

**Figure S9.** Thermodynamic calculations regarding formation of elementary sulfur that are formed from the Claus reaction when  $\text{H}_2\text{S}$  and  $\text{SO}_2$  are present in a gas.

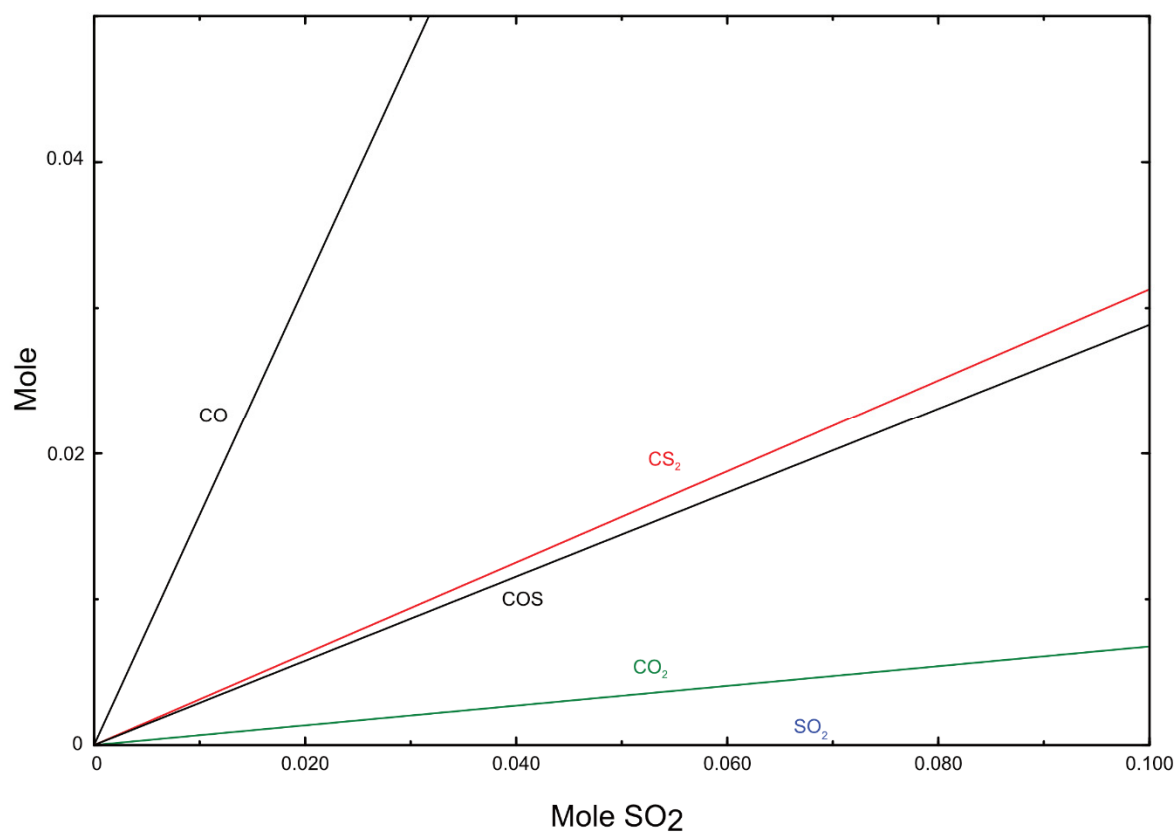

**Figure S10.** Thermodynamic calculations regarding reactions of  $\text{SO}_2$  and C as a function of  $\text{SO}_2$  at  $850^\circ\text{C}$ .  $\text{SO}_2$  are expected to increase the conversion of carbon to both CO and sulfur containing carbon species like  $\text{CS}_2$  and COS.

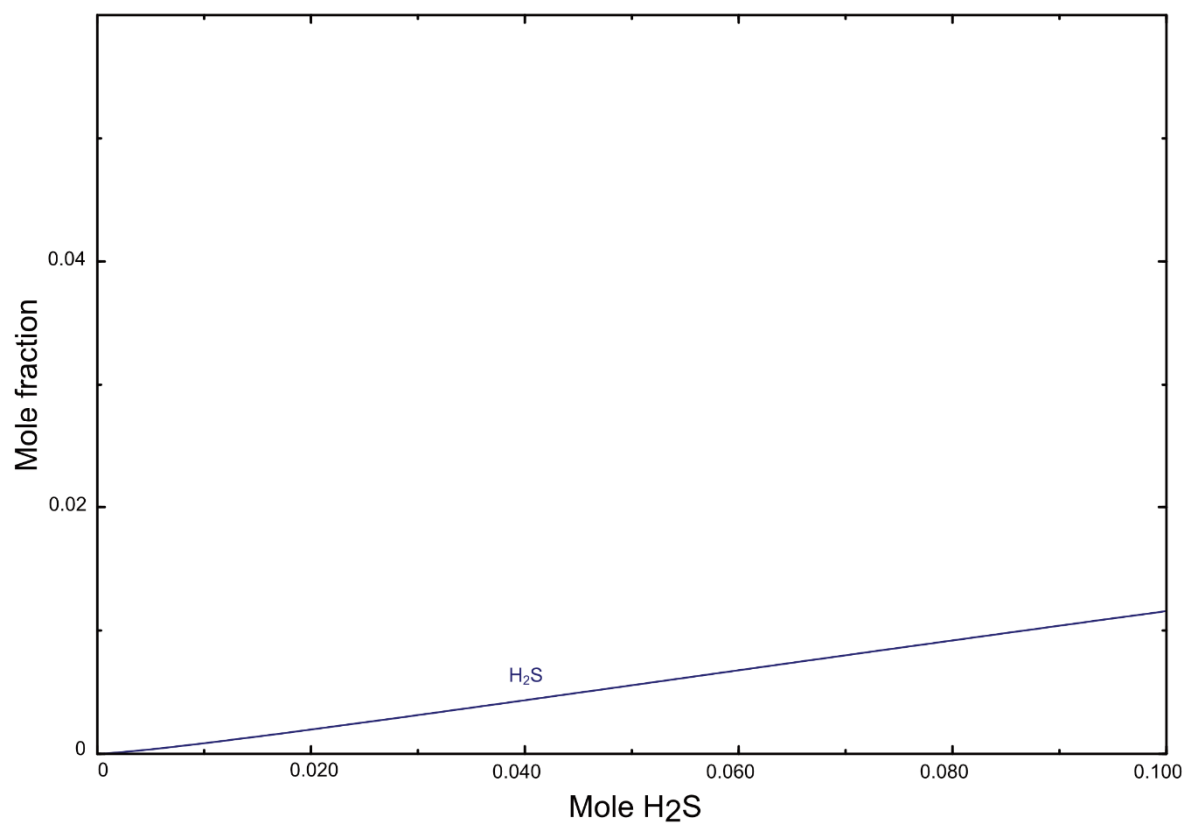

**Figure S11.** Thermodynamic calculations regarding reactions of  $\text{H}_2\text{S}$  and  $\text{C}$  as a function of  $\text{H}_2\text{S}$  at  $850^\circ\text{C}$ . No conversion of the carbon is expected to occur.
